# Supplementary material for: Amphiphilic fullerene/ZnO hybrids as cathode buffer layers to improve charge selectivity of inverted polymer solar cells
Source: Royal Society of Chemistry journal article supplement (doi:10.1039/c5nr01456e), 2015-01-01
Supplement: c5nr01456e1.pdf [file c5nr01456e1.pdf]

**Supporting Information for**

**Amphiphilic Fullerenes/ZnO Hybrids as Cathode Buffer Layer to Improve  
Charge Selectivity of Inverted Polymer Solar Cells**

Ting Hu<sup>a</sup>, Lie Chen<sup>a,b</sup>, Kai Yuan<sup>a</sup>, Yiwang Chen<sup>\*a,b</sup>

<sup>a</sup>College of Chemistry/Institute of Polymers, Nanchang University, 999 Xuefu  
Avenue, Nanchang 330031, China

<sup>b</sup>Jiangxi Provincial Key Laboratory of New Energy Chemistry, Nanchang University,  
999 Xuefu Avenue, Nanchang 330031, China

\*Corresponding author. Tel.: +86 791 83968703; fax: +86 791 83969561. E-mail:  
ywchen@ncu.edu.cn (Y. Chen).

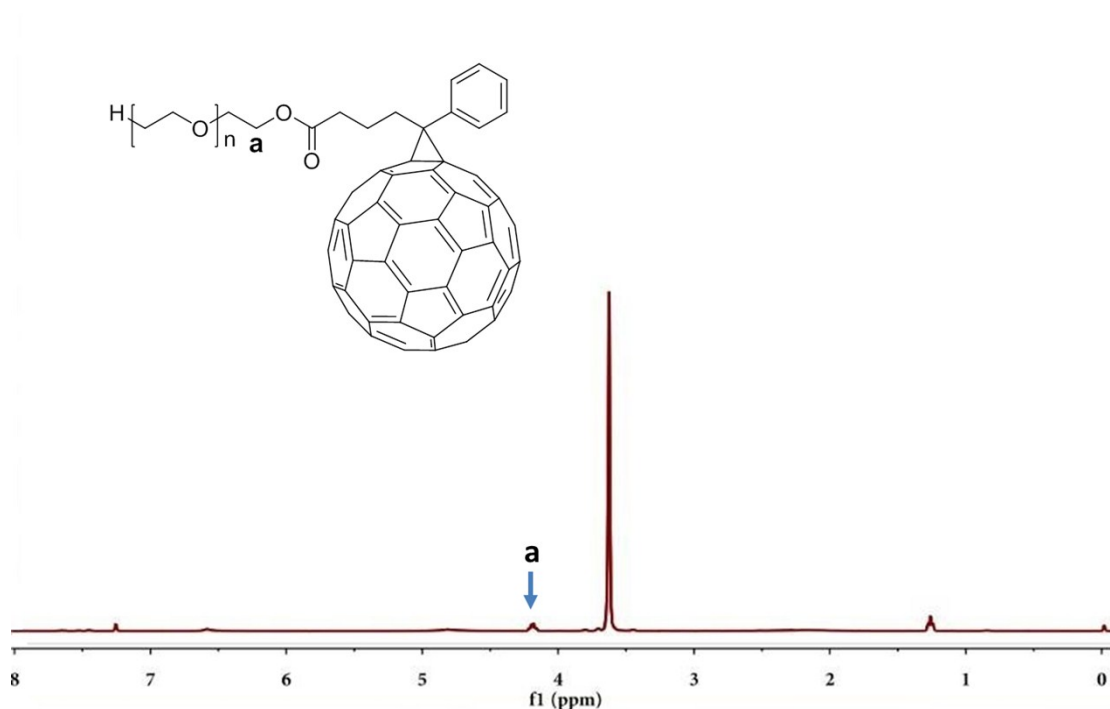

**Figure S1.** <sup>1</sup>H NMR spectrum of C60-PEG and the inset is the molecular structure of C60-PEG.

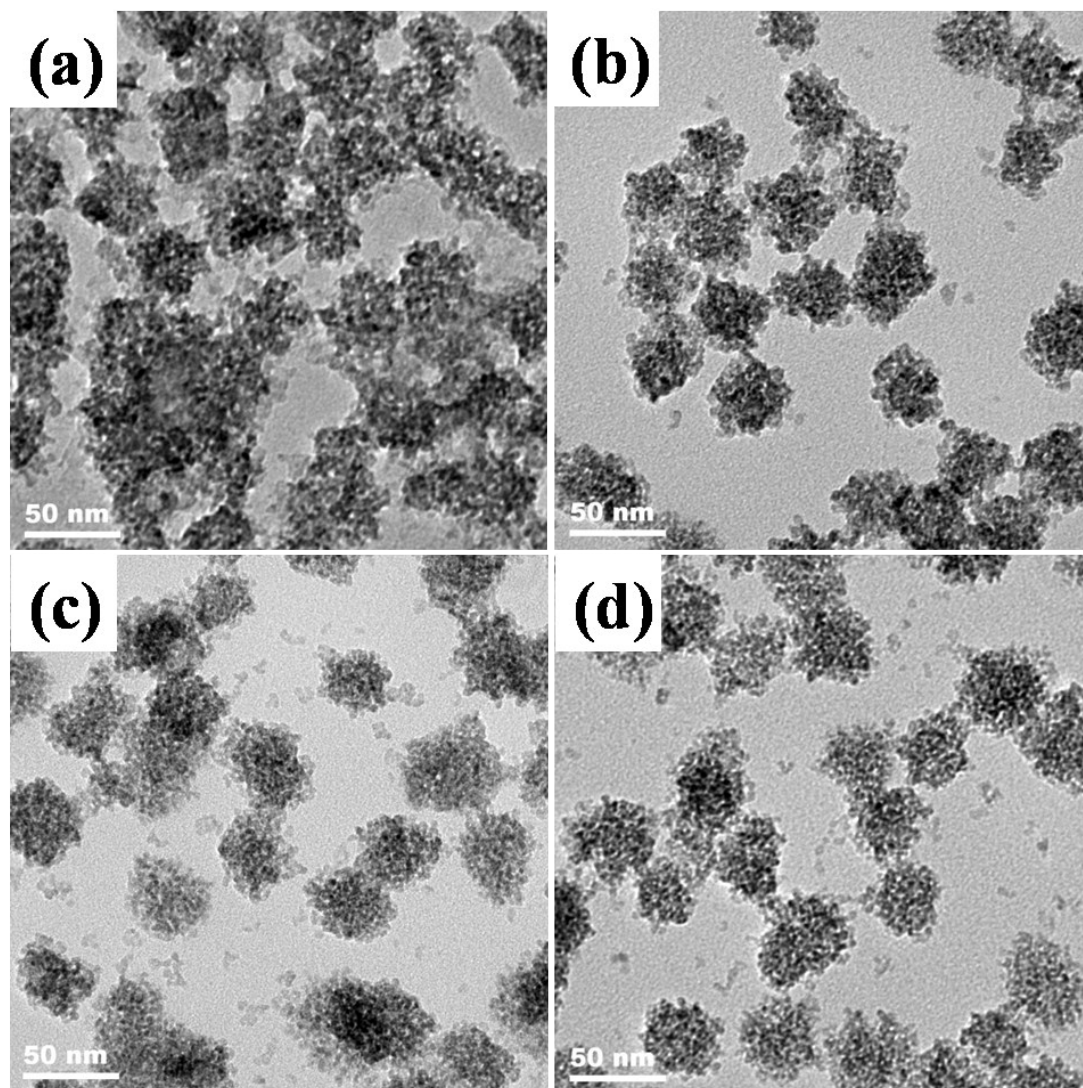

**Figure S2.** TEM images of (a) ZnO, (b) ZnO/1%C60-PEG, (c) ZnO/3%C60-PEG and (d) ZnO/5%C60-PEG.

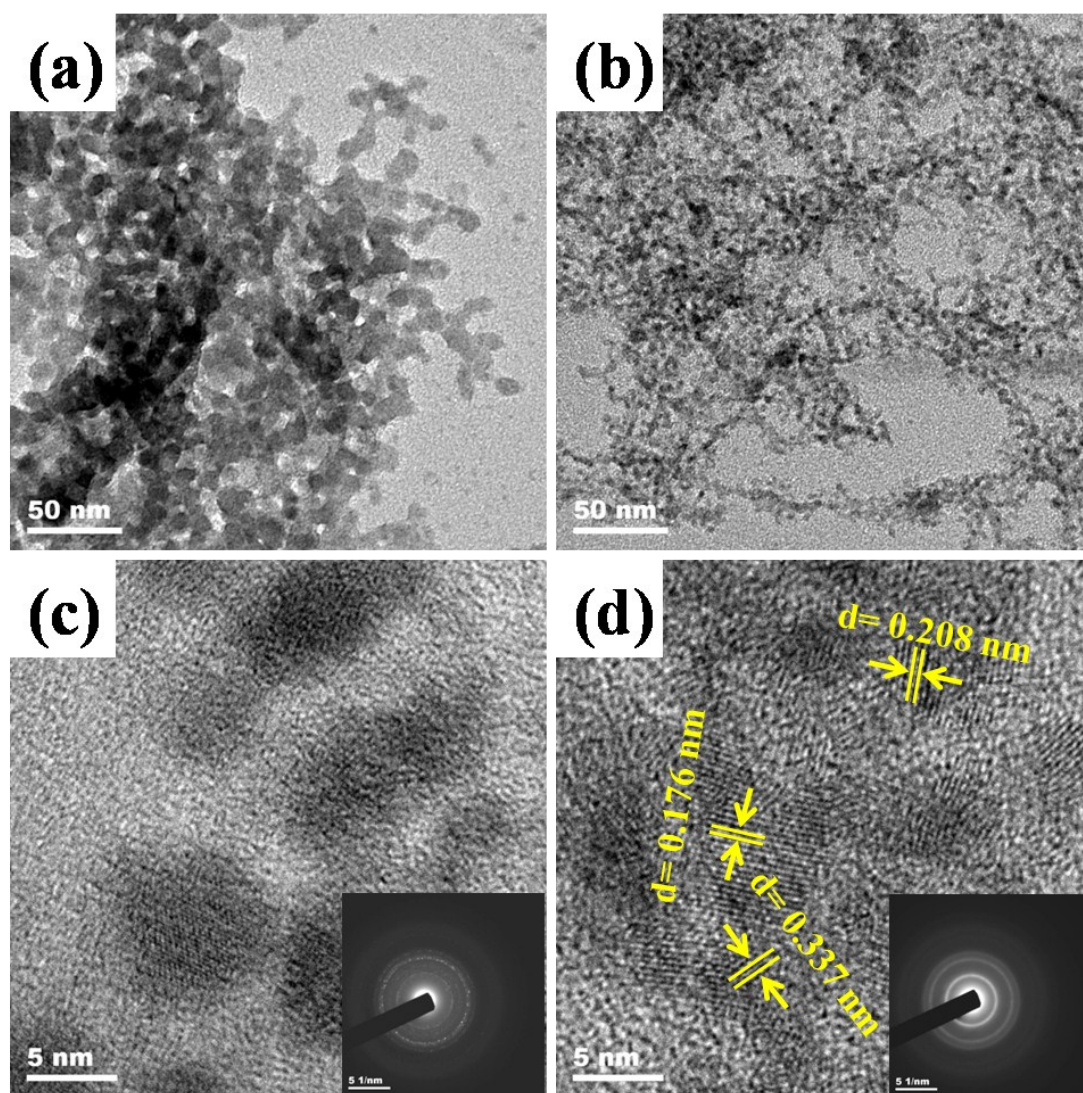

**Figure S3.** TEM images and the corresponding HRTEM images of (a, c) CdS and (b,d) CdS@3%C60-PEG. The inset of (c) and (d) is the SAED pattern of CdS and CdS@3%C60-PEG.

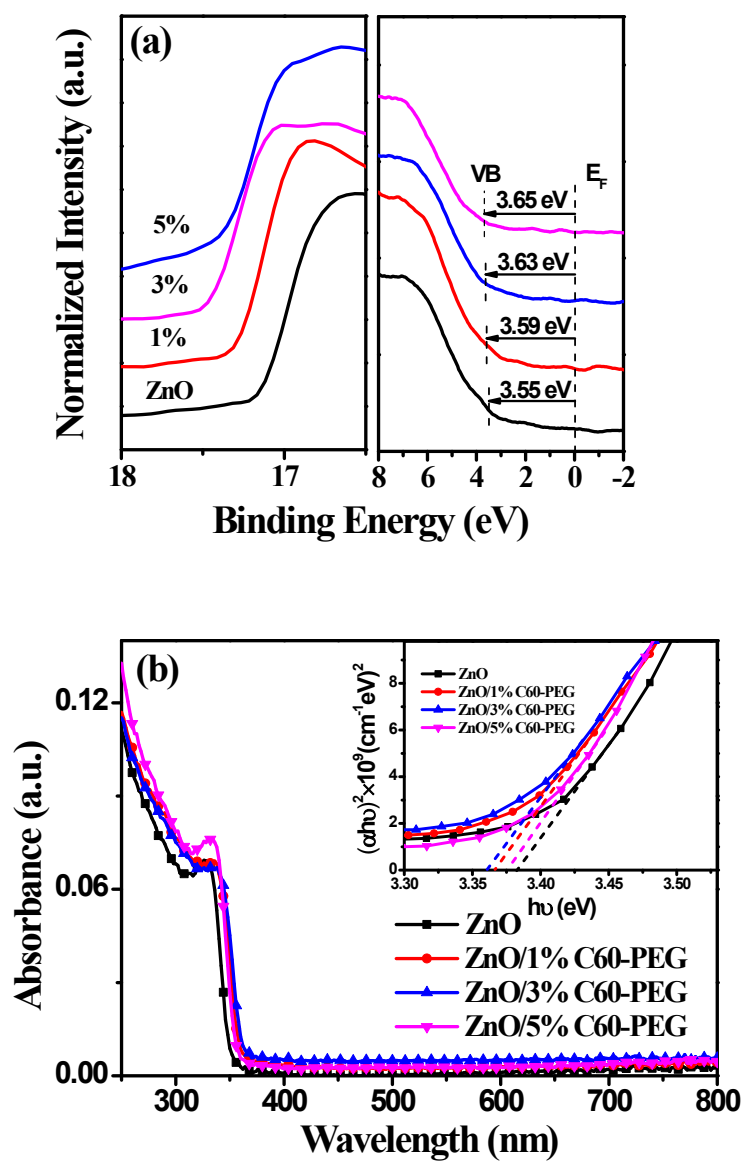

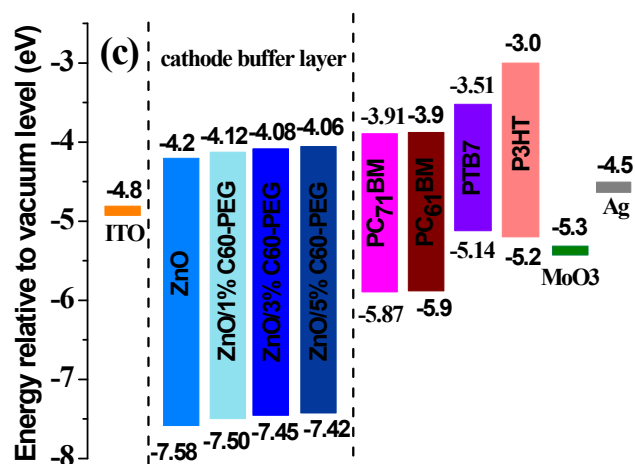

**Figure S4.** (a) UPS spectra and (b) UV-vis absorbance spectra (the inset is plots of  $(\alpha h\nu)^2$  versus energy) of ZnO, ZnO/1%C60-PEG, ZnO/3%C60-PEG and ZnO/5%C60-PEG; (c) the corresponding energy level diagram of the components of the devices.

**Table S1.** Energy levels of ZnO, ZnO/1%C60-PEG, ZnO/3%C60-PEG and ZnO/5%C60-PEG.

| Buffer layer   | Eg(UV-Vis) | HOMO(UPS) | LUMO(Eg) |
|----------------|------------|-----------|----------|
| ZnO            | 3.38       | 7.58      | 4.20     |
| ZnO/1% C60-PEG | 3.38       | 7.50      | 4.12     |
| ZnO/3% C60-PEG | 3.37       | 7.45      | 4.08     |
| ZnO/5% C60-PEG | 3.36       | 7.42      | 4.06     |

**Table S2.** Electron mobility of (a)ZnO, (b) ZnO@0.1%C60-PEG, (c) ZnO@0.5%C60-PEG, (d) ZnO@1%C60-PEG, and (e) ZnO@5%C60-PEG.

| Devices                                                       | a                     | b                     | c                     | d                           | e                     |
|---------------------------------------------------------------|-----------------------|-----------------------|-----------------------|-----------------------------|-----------------------|
| $\mu_e$<br>(cm <sup>2</sup> V <sup>-1</sup> s <sup>-1</sup> ) | 1.96×10 <sup>-4</sup> | 4.36×10 <sup>-4</sup> | 6.83×10 <sup>-4</sup> | <b>9.75×10<sup>-4</sup></b> | 6.31×10 <sup>-4</sup> |

**Table S3.** Electron mobility of (a)ZnO, (b) ZnO/1%C60-PEG, (c) ZnO/3%C60-PEG, and (d) ZnO/5%C60-PEG.

| Devices                                                       | a                     | b                     | c                           | d                     |
|---------------------------------------------------------------|-----------------------|-----------------------|-----------------------------|-----------------------|
| $\mu_e$<br>(cm <sup>2</sup> V <sup>-1</sup> s <sup>-1</sup> ) | 2.45×10 <sup>-4</sup> | 4.18×10 <sup>-4</sup> | <b>8.11×10<sup>-4</sup></b> | 5.85×10 <sup>-4</sup> |

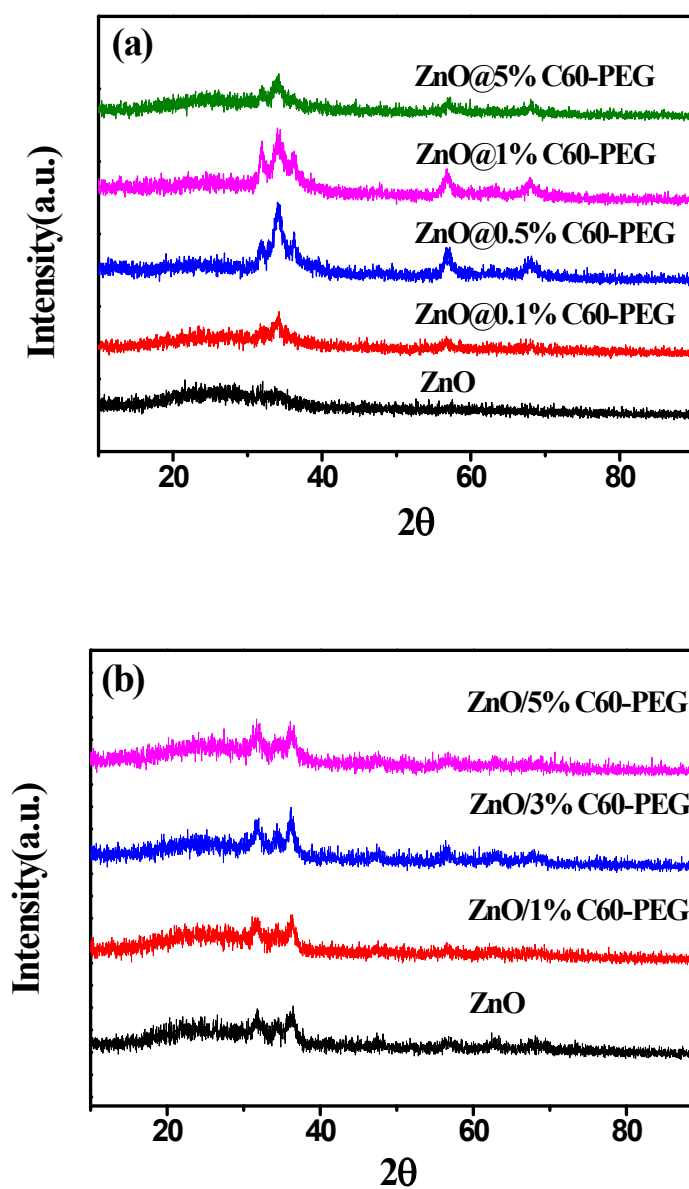

**Figure S5.** (a) XRD patterns of ZnO, ZnO@0.1%C60-PEG, ZnO@0.5%C60-PEG, ZnO@1%C60-PEG and ZnO@5%C60-PEG. (b) XRD patterns of ZnO, ZnO/1%C60-PEG, ZnO/3%C60-PEG and ZnO/5%C60-PEG.

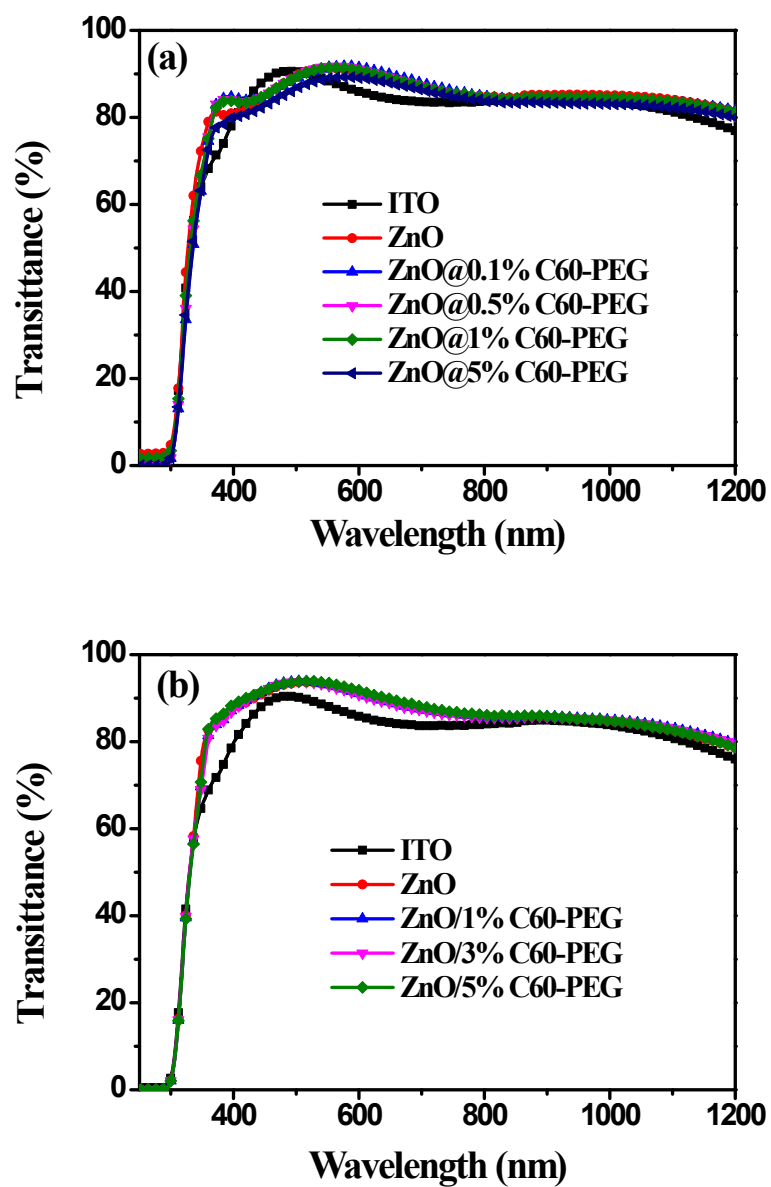

**Figure S6.** (a) Optical transmission spectra of ITO, ZnO, ZnO@0.1%C60-PEG, ZnO@0.5%C60-PEG, ZnO@1%C60-PEG and ZnO@5%C60-PEG. (b) Optical transmission spectra of ITO, ZnO, ZnO/1%C60-PEG, ZnO/3%C60-PEG and ZnO/5%C60-PEG.

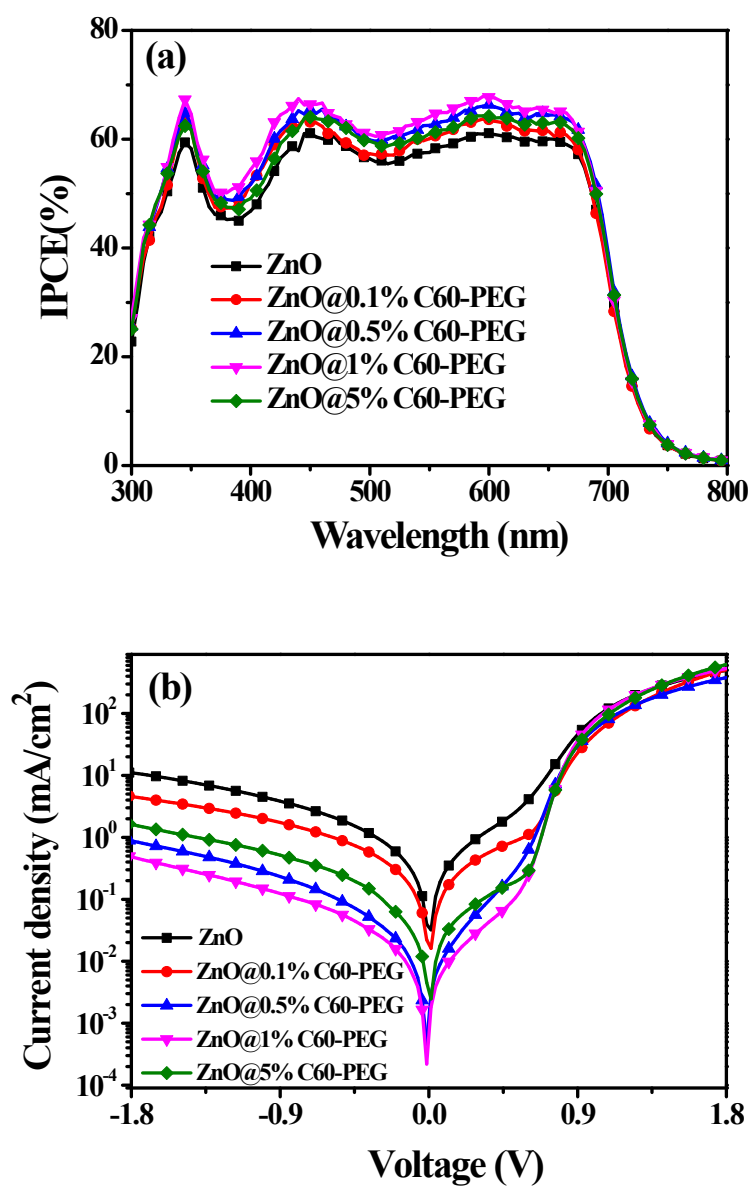

**Figure S7.** Performance of devices under simulated AM 1.5 G (100 mW·cm<sup>-2</sup>) illumination. (a) IPCE spectra and (b) *J-V* curve under dark of the devices ITO/cathode buffer layer/PTB7:PC<sub>71</sub>BM/MoO<sub>3</sub>/Ag.

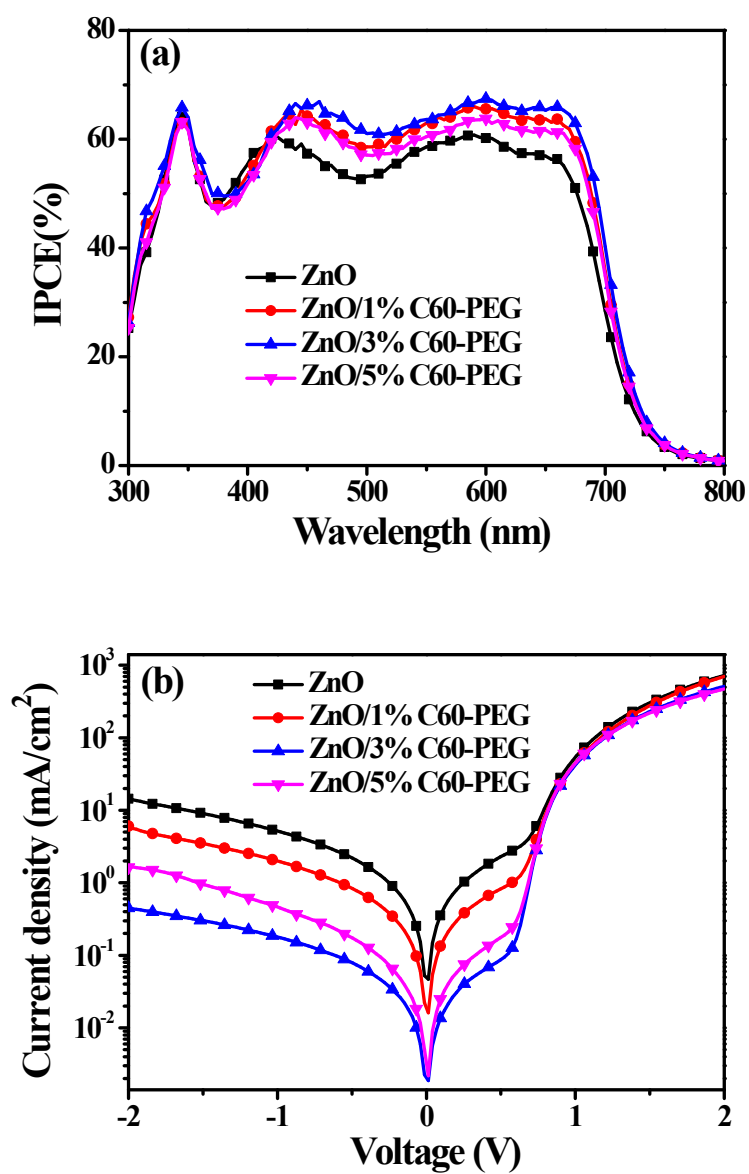

**Figure S8.** Performance of devices under simulated AM 1.5 G ( $100 \text{ mW}\cdot\text{cm}^{-2}$ ) illumination. (a) IPCE spectra and (b)  $J-V$  curve under dark of the devices ITO/cathode buffer layer/PTB7:PC<sub>71</sub>BM/MoO<sub>3</sub>/Ag.

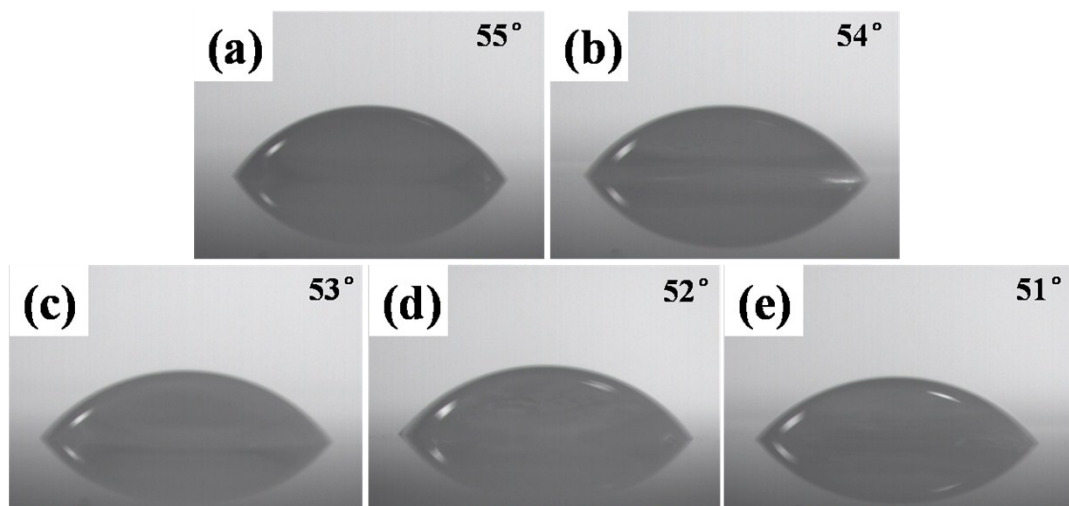

**Figure S9.** Measured water contact angle between a drop of deionized water on (a) ZnO, (b) ZnO@0.1%C60-PEG, (c) ZnO@0.5%C60-PEG, (d) ZnO@1%C60-PEG and (e) ZnO@5%C60-PEG.

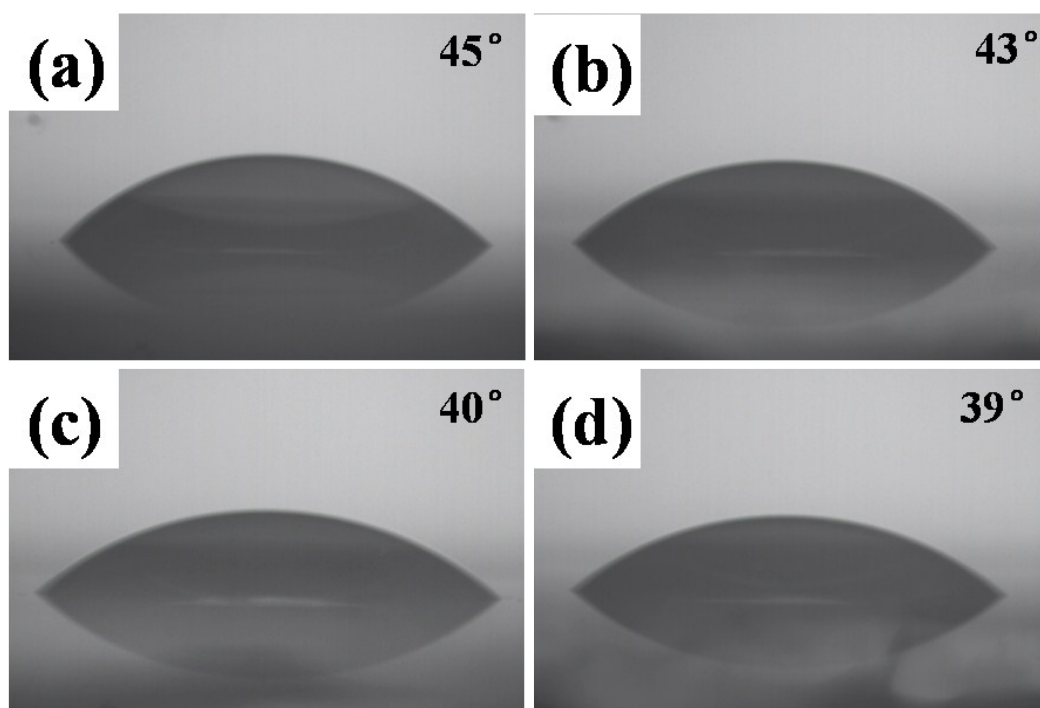

**Figure S10.** Measured water contact angle between a drop of deionized water on (a) ZnO, (b) ZnO/1%C60-PEG, (c) ZnO/3%C60-PEG and (d) ZnO/5%C60-PEG.

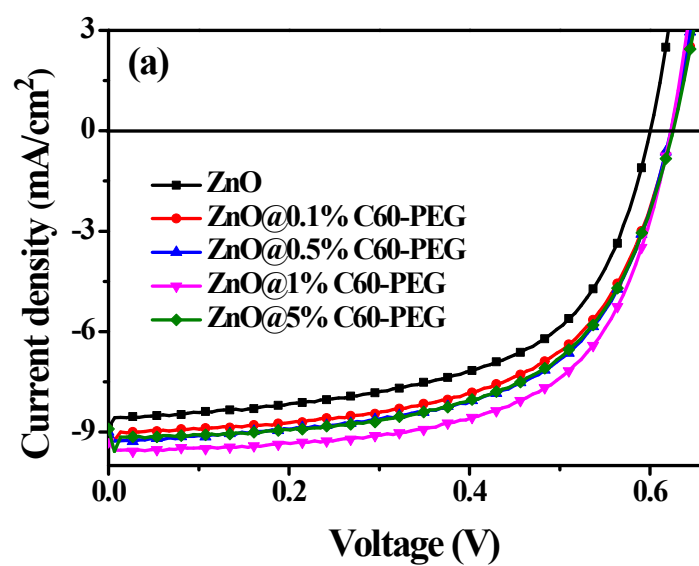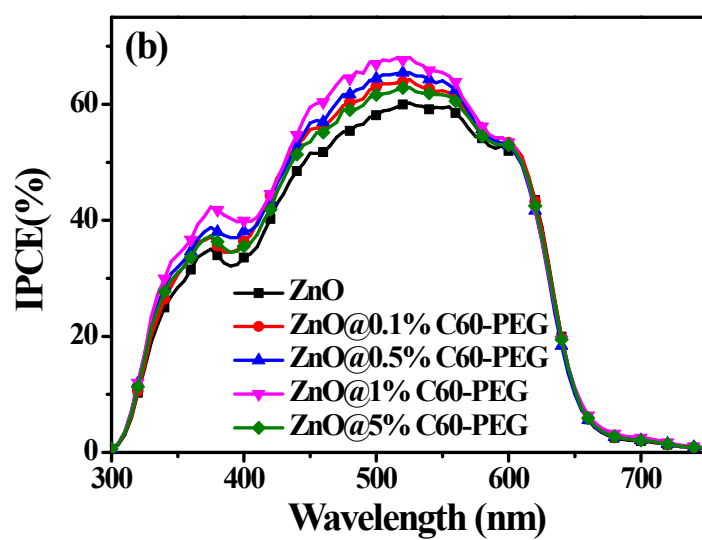

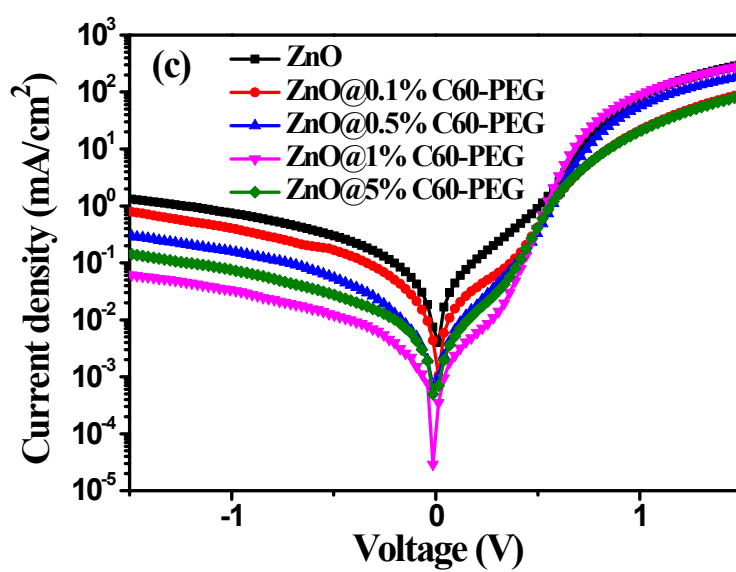

**Figure S11.** Performance of devices under simulated AM 1.5 G ( $100 \text{ mW} \cdot \text{cm}^{-2}$ ) illumination. (a) Illuminated  $J$ - $V$  characteristics, (b) IPCE spectra and (c)  $J$ - $V$  curve under dark of the devices ITO/cathode buffer layer/P3HT:PC<sub>61</sub>BM/MoO<sub>3</sub>/Ag.

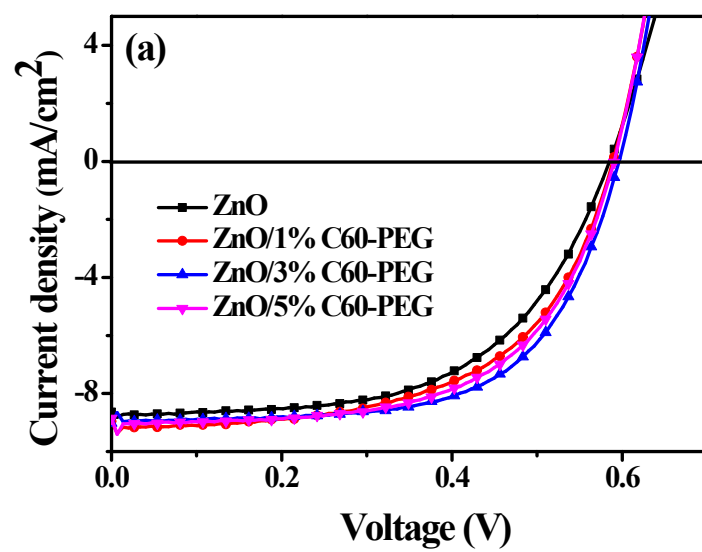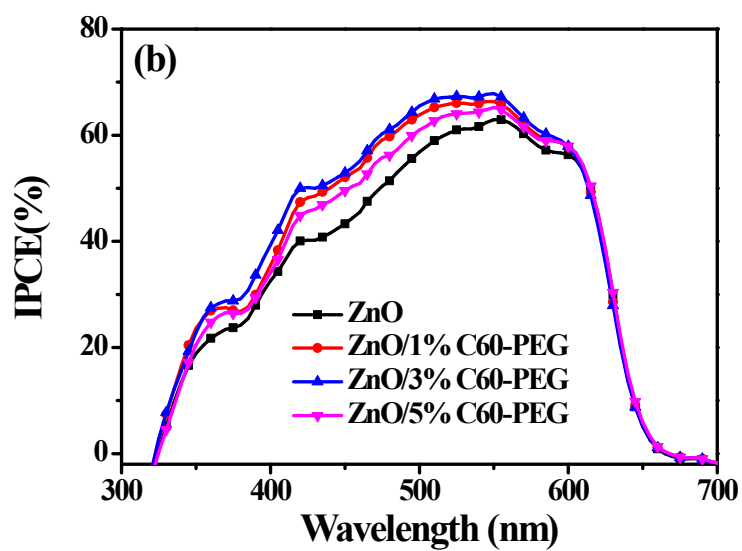

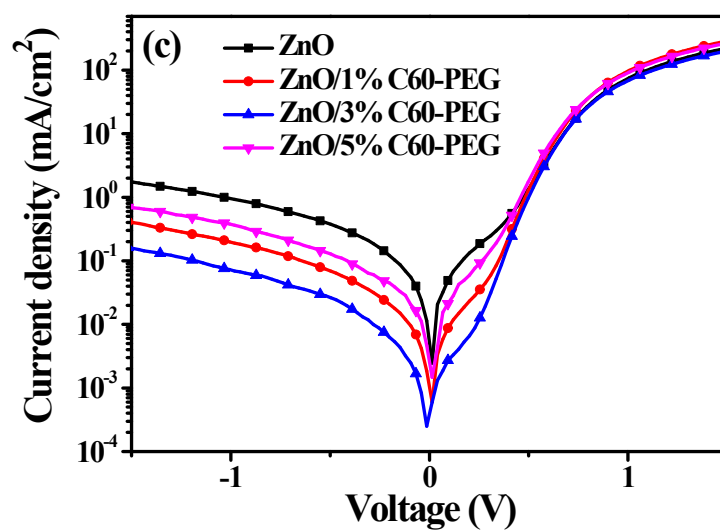

**Figure S12.** Performance of devices under simulated AM 1.5 G ( $100 \text{ mW} \cdot \text{cm}^{-2}$ ) illumination. (a) Illuminated  $J$ - $V$  characteristics, (b) IPCE spectra and (c)  $J$ - $V$  curve under dark of the devices ITO/cathode buffer layer/P3HT:PC<sub>61</sub>BM/MoO<sub>3</sub>/Ag.

**Table S4.** Photovoltaic parameters of the devices with ITO/cathode buffer layer/P3HT:PC<sub>61</sub>BM/MoO<sub>3</sub>/Ag structure. <sup>a</sup>All data of devices had been tested from more than five substrates (20 chips) to ensure reproducibility. <sup>b</sup>The ZnO was synthesized following the process reported by Heeger *et al.* <sup>c</sup>The ZnO was synthesized following the process reported by Beek *et al.*

| Device <sup>a</sup>  | $J_{sc}$<br>[mA cm <sup>-2</sup> ] | $V_{oc}$<br>[V]    | FF<br>[%]       | PCE<br>[%]     |
|----------------------|------------------------------------|--------------------|-----------------|----------------|
| ZnO <sup>b</sup>     | 8.86±0.14                          | 0.599±0.008        | 57.0±2.1        | 3.0±0.2        |
| ZnO@0.1%C60-PEG      | 8.93±0.12                          | 0.623±0.006        | 60.0±1.6        | 3.3±0.2        |
| ZnO@0.5%C60-PEG      | 9.00±0.10                          | 0.622±0.004        | 62.0±1.3        | 3.5±0.1        |
| <b>ZnO@1%C60-PEG</b> | <b>9.29±0.11</b>                   | <b>0.623±0.005</b> | <b>64.3±1.1</b> | <b>3.7±0.1</b> |
| ZnO@5%C60-PEG        | 8.91±0.13                          | 0.624±0.006        | 61.8±1.5        | 3.4±0.2        |
| ZnO <sup>c</sup>     | 8.64±0.13                          | 0.584±0.007        | 57.8±1.4        | 2.9±0.1        |
| ZnO/1%C60-PEG        | 8.96±0.14                          | 0.588±0.004        | 58.7±1.7        | 3.1±0.2        |
| <b>ZnO/3%C60-PEG</b> | <b>9.02±0.12</b>                   | <b>0.595±0.006</b> | <b>62.5±1.2</b> | <b>3.4±0.1</b> |
| ZnO/5%C60-PEG        | 8.86±0.12                          | 0.589±0.003        | 61.4±1.6        | 3.2±0.1        |

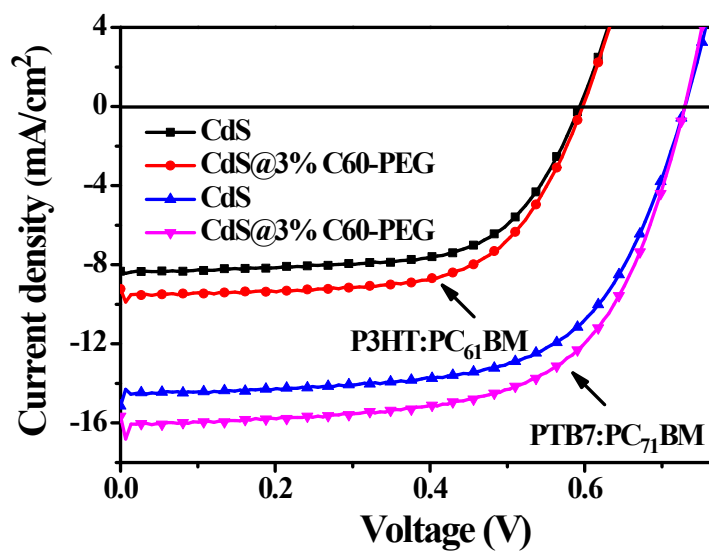

**Figure S13.** Illuminated  $J$ - $V$  curves of the devices with ITO/cathode buffer layer/active layer/ $\text{MoO}_3$ /Ag structure by using CdS and CdS@3%C60-PEG as cathode buffer layer.

**Table S5.** Photovoltaic parameters of the devices with ITO/cathode buffer layer/active layer/MoO<sub>3</sub>/Ag structure. <sup>a</sup>All data of devices had been tested from more than five substrates (20 chips) to ensure reproducibility.

| Device <sup>a</sup> | Active Layer                 | $J_{sc}$<br>[mA cm <sup>-2</sup> ] | $V_{oc}$<br>[V] | FF<br>[%] | PCE<br>[%] |
|---------------------|------------------------------|------------------------------------|-----------------|-----------|------------|
| CdS                 | P3HT:PC <sub>61</sub> B<br>M | 8.33±0.23                          | 0.593±0.05      | 64.8±1.2  | 3.2±0.2    |
| CdS@3% C60-PEG      | P3HT:PC <sub>61</sub> B<br>M | 9.22±0.20                          | 0.597±0.04      | 66.2±1.4  | 3.6±0.1    |
| CdS                 | PTB7:PC <sub>71</sub> BM     | 15.14±0.12                         | 0.728±0.2       | 60.9±1.3  | 6.7±0.1    |
| CdS@3% C60-PEG      | PTB7:PC <sub>71</sub> BM     | 15.66±0.17                         | 0.728±0.4       | 64.9±1.5  | 7.4±0.1    |

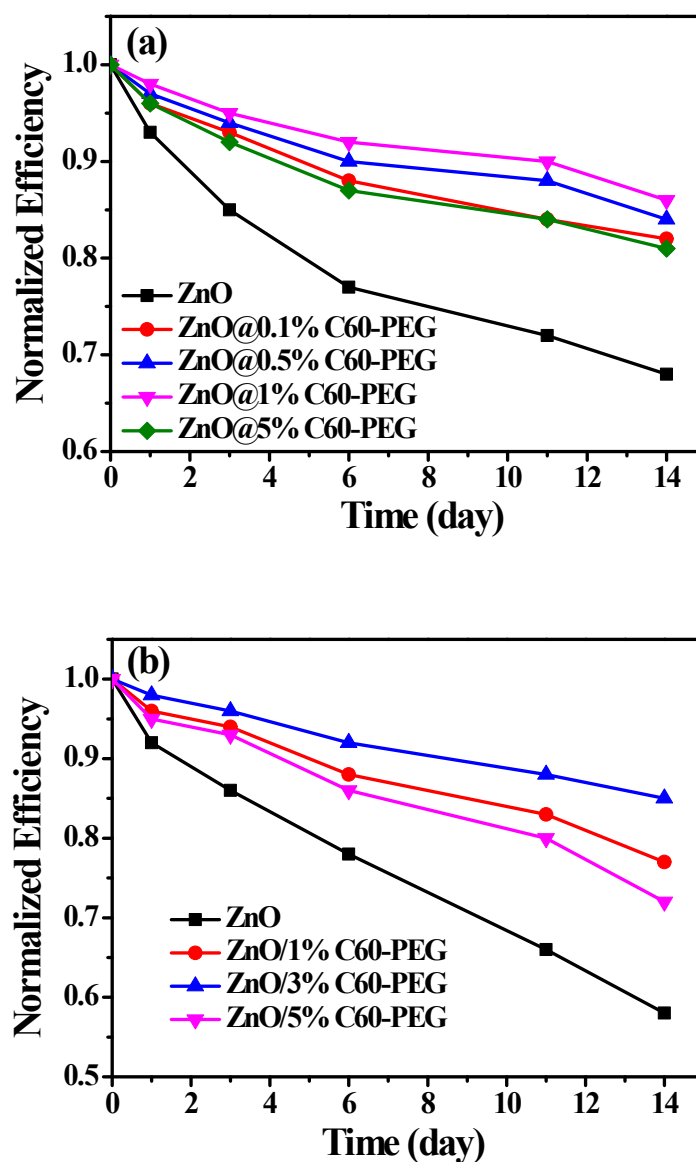

**Figure S14.** (a) Normalized efficiency decay of inverted devices with ZnO, ZnO@0.1%C60-PEG, ZnO@0.5%C60-PEG, ZnO@1%C60-PEG and ZnO@5%C60-PEG as cathode buffer layer. (b) Normalized efficiency decay of inverted devices with ZnO, ZnO/1%C60-PEG, ZnO/3%C60-PEG and ZnO/5%C60-PEG as cathode buffer layer.
